# Supplementary material for: Development and validation of a sleep questionnaire, SNoRE 3.0, to evaluate sleep in companion dogs
Source: PubMed Central journal article supplement (PMC10432410; doi:10.1038/s41598-023-40048-1), 2023-08-16
Supplement: 41598_2023_40048_MOESM1_ESM.pdf [file 41598_2023_40048_MOESM1_ESM.pdf]

## Sleep Questionnaire

1. Over the last 7 days, what has been your dog's ability to sleep at bed time.  
Fill in the oval next to the number that best describes your dog's ability to sleep:

Falls asleep easily at bedtime

Takes much longer than usual to fall asleep

01    02    03    04    05    06    07    08    09    010

2. Over the last 7 days, what has been your dog's ability to sleep continuously during the night.

Fill in the oval next to the number that best describes your dog's ability to sleep:

Never gets up/paces

Constantly getting up/pacing

01    02    03    04    05    06    07    08    09    010

3. Fill in the oval next to the one number that best describes your dog's sleep over the last 7 days

Never needs to eliminate during the night

Needs to eliminate several times every night

01    02    03    04    05    06    07    08    09    010

4. Fill in the oval next to the one number that best describes your dog's sleep over the last 7 days

Never dreams

Constantly dreaming (vocalizing/twitching)

01    02    03    04    05    06    07    08    09    010

5. Fill in the oval next to the one number that best describes how much vocalizations affected your dog's sleep over the last 7 days.

Never wake him/her up

Vocalizations are so loud or frequent that they constantly wake him/her up

01    02    03    04    05    06    07    08    09    010

6. Fill in the oval next to the one number that best describes how much twitching affected your dog's sleep over the last 7 days.

Never wake him/her up

Twitches are so frequent and/or severe that constantly wake him/her up

01    02    03    04    05    06    07    08    09    010

## Sleep Questionnaire

7. Over the last 7 days how much has your dog snored at night?

Never snores

Constantly snoring

01    02    03    04    05    06    07    08    09    010

8. Fill in the oval next to the number that best describes your dog's breathing while sleeping over the last 7 days

Never pauses breathing

Has several breathing interruptions

01    02    03    04    05    06    07    08    09    010

9. Fill in the oval next to the one number that best describes your dog's sleep during the day time over the last 7 days in comparison with 6 months ago

J cu'ungr v'uko kɔt'pwo dgt'qh'pɔr u'

Has increased considerably  
the number and duration of naps

01    02    03    04    05    06    07    08    09    010
